# Supplementary material for: Development of S Haplotype-Specific Markers to Identify Genotypes of Self-Incompatibility in Radish (Raphanus sativus L.)
Source: MDPI journal article supplement (doi:10.3390/plants13050725), 2024-03-04
Supplement: s1 [file s1]

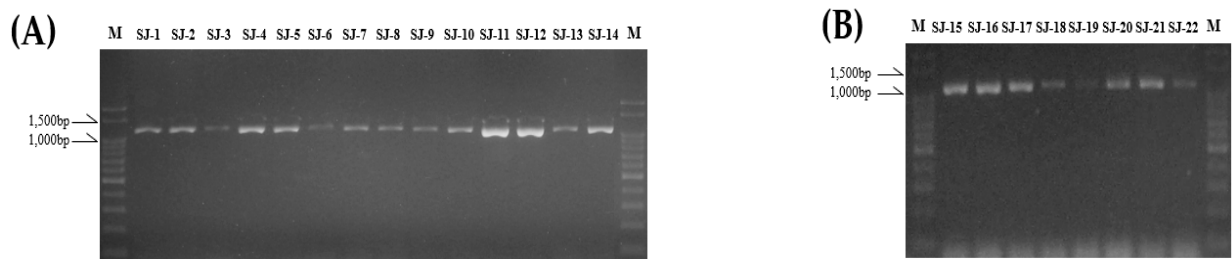

**Figure S1.** PCR result of 22 radish breeding lines ('SJ-1~22') using class I, II kinase domain of SRK (SRK-KD) primer set. (A) PCR amplification of class I SRK-KD using UVSRK-F + UVSRK-R primer set; (B): PCR amplification of class II SRK-KD using KS2 + KA2 primer set; M: 100bp size marker.

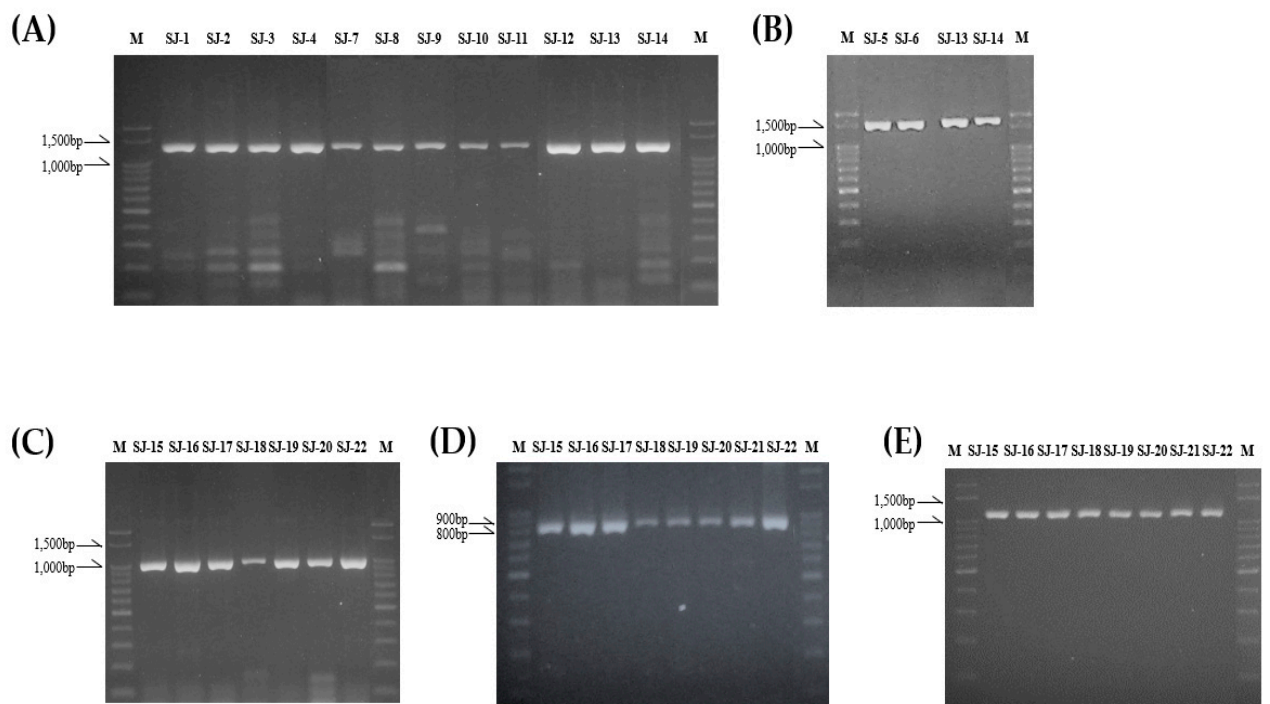

**Figure S2.** PCR result of 22 radish breeding lines ('SJ-1~22') using class I, II SLG primer set. (A) PCR amplification of class I SLG using SLG-I-F + SLG-I-R primer set; (B): PCR amplification of class I SLG using PS22 + SLG-I-R primer set; (C): PCR amplification of class II SLG using SLG-II-F + SLG-II-R primer set; (D): PCR amplification of class II SLG using Rs9 SLG-F + Rs9 SLG-R primer set; M: 100bp size marker; (E): PCR amplification of class II SLG using UVSLGII-F + UVSLGII-R primer set; M: 100bp size marker.



**Figure S3. Continued.**

| Exon 7                  |                    |                                                                                                                            |
|-------------------------|--------------------|----------------------------------------------------------------------------------------------------------------------------|
| a                       | SRK1-KD(Haseyama)  | GTGTTCAAGAACGTGCCGAGCACAGACCAACGATGTCGTGCGTGGTTTGGATGCTTGGAAAGTGAAGCAACAGAGATTCTTAAGCCTAATCCGCCAGGTTATTACGTGCGAAGATGTCTT   |
|                         | SRK2-KD(Haseyama)  | GTGTTCAAGAACCTTGCAAGAGACAGACCAACATGTGCTCTGTGGTTTGGATGCTTGGAAAGTGAAGCAACAGAGATTCTCAGCCTAAACCCGCAATGTCATTGCCTCGAAGAAAGTCCAT  |
|                         | SRK4-KD(Haseyama)  | GTGTTCAAGATCTTGCAAGAGACAGACCAACCATGTCAATTTGTGGTTTGGATGCTTGGAAATGAAGCAACAGAGATTCTCAGCCTAAATGCGCAGGTTATTGCCTCGAAGAAAGTCCCT   |
|                         | SRK5-KD(Haseyama)  | GTGTTCAAGAACGTGCGGAGCAGACCAACATGTCGTGAGTGGTTCGGATGCTTGGAAAGTGAAGCAATAGAGATTCTCAGCCTAAACCCCGAGGTTATTGCCTCGTAAGAAAGTCATT     |
|                         | SRK17-KD(Haseyama) | GTGTTCAAGAGCGTGCAGAGCACAGACCAACGATGTCGTGCGTAGTTTGGATGCTTGGAAAGTGAAGCAACAGAGATTCTCAGCCTAAACCCGCAATGTCATTGCCTCGAAGAAAGTCTTT  |
|                         | SRK18-KD(Haseyama) | GCCTTCAAGAACGTGCAAGACAGACCAACGATGTCGTCTGTGGTTTGGATGCTTGGAAAGTGAAGTAAACAGAGATTCTCAGCCTAAACCCGCAATGTCATTGCCTCGAAGAAAGTCTTT   |
|                         | SRK23-KD(Haseyama) | GTATTCAAGAACGTGCGGTGCACAGACCAACGATGTCGTGCGTGGTTTGGATGCTTGGAAAGTGAAGCAACAGCGATTCTCAGCCTAAACCCGCAATGTCATTGCCTCATACCAAGTCTTT  |
|                         | SRK31-KD(Haseyama) | GTATTCAAGAACGTGCGGAGCACAGACCAACGATGTCGTGCGTGGTTTGGATGCTTGGAAAGTGAAGCAACAGCGATTCTCAGCCTAAACCCGCAATGTCATTGCCTCATACCAAGTCTTT  |
|                         | SRK7-KD(Kim)       | GTATTCAAGAACGTGCGG-----                                                                                                    |
|                         | SRK10-KD(Kim)      | GTATTCAAGAACGTGCGG-----                                                                                                    |
|                         | SRK16-KD(Kim)      | GTATTCAAGAACGTGCGG-----                                                                                                    |
|                         | SRK17-KD(Kim)      | GTATTCAAGAACGTGCGG-----                                                                                                    |
|                         | SRK11-KD(Lim)      | GTATTCAAGAACGTGCGGAGCACAGACCAACGATGTCGTGCGTGGTTTGGGTCCTTGGAAAGTGAAGCAACAGCGATTCTCAGCCTAAACCCGCAATGTCATTGCCTCATACCAAGTCTTT  |
|                         | SRK29-KD(Lim)      | GTATTCAAGAACGTGCGGAGCACAGACCAACGATGTCGTGCGTGGTTTGGATGCTTGGAAAGTGAAGCAACAGCGATTCTCAGCCTAAACCCGCAATGTCATTGCCTCATACCAAGTCTTT  |
|                         | SRK1-KD(Lim)       | GTGTTCAAGAACCTTGCAAGAGACAGACCAACGATGTCGACTGTGGTTTGGATGCTTGGAAAGTGAAGCAACAGAGATTCTCAGCCTAAACCCGCAATGTCATTGCCTCGAAGAAAGTCTTT |
|                         | SRK8-KD(Lim)       | GCCTTCAAGAACGTGCAAGACAGACCAACGATGTCGTCTGTGGTTTGGATGCTTGGAAAGTGAAGTAAACAGAGATTCTCAGCCTAAACCCGCAATGTCATTGCCTCGAAGAAAGTCTTT   |
|                         | SRK10-KD(Lim)      | GTATTCAAGAACGTGCGGTGCACAGACCAACGATGTCGTGCGTGGTTTGGATGCTTGGAAAGTGAAGCAACAGCGATTCTCAGCCTAAACCCGCAATGTCATTGCCTCATACCAAGTCTTT  |
|                         | SRK16-KD(Lim)      | GTATTCAAGAACGTGCGGAGCACAGACCAACGATGTCGTGCGTGGTTTGGATGCTTGGAAAGTGAAGCAACAGCGATTCTCAGCCTAAACCCGCAATGTCATTGCCTCATACCAAGTCTTT  |
|                         | SRK18-KD(Lim)      | GTGTTCAAGAACATGCAAGGACAGACCAACGATGCCACTGTGGTTTGGATGCTTGGAAAGTGAAGCAACAGAGATTCTCAGCCTAAACCCGCAATGTCATTGCCTCGAAGAAAGTCTCT    |
| *      *****      *** * |                    |                                                                                                                            |
| b                       | SRK1-KD(Haseyama)  | ATGAAATAATCCTTCATCAAGTAGGCTTTGCGATGACTATGAATCCT-----                                                                       |
|                         | SRK2-KD(Haseyama)  | ATGAACTTGATCCTTCATTAAAGTAGGCAGTGTACGACGATGAATCCTGG-----                                                                    |
|                         | SRK4-KD(Haseyama)  | ACGAACTTGATCCTTCATCAAGTAGGCAGTGTGCGAC-----                                                                                 |
|                         | SRK5-KD(Haseyama)  | ATGAAATAAACCTTCCTCAAGTAGGCAGTGCAGCAGATGAATCCTGGAGC-----                                                                    |
|                         | SRK17-KD(Haseyama) | ATGCAATAATCCTTCCTCAAGTAGGCATTGCGAAGACATGAATCCTGG-----                                                                      |
|                         | SRK18-KD(Haseyama) | ATGAACTTGATCCTTCATCAAGTAGGCAGTGTGACGACGATCAATCC-----                                                                       |
|                         | SRK23-KD(Haseyama) | ATGCAATAATCCTTCCTCAGTAGGCATCCAGCAGATGAATCCTGGAGCAGTGAACG                                                                   |
|                         | SRK31-KD(Haseyama) | ATGCAATAATCCTTCCTCAGTAGGCATCCAGCAGATGAATCC-----                                                                            |
|                         | SRK7-KD(Kim)       | -----                                                                                                                      |
|                         | SRK10-KD(Kim)      | -----                                                                                                                      |
|                         | SRK16-KD(Kim)      | -----                                                                                                                      |
|                         | SRK17-KD(Kim)      | -----                                                                                                                      |
|                         | SRK11-KD(Lim)      | ATGCAATAATCCTTCCTCAGTAGGCATCCAGCAGATGAATCCTGGAGCAGTGAACG                                                                   |
|                         | SRK29-KD(Lim)      | ATGCAATAATCCTTCCTCAGTAGGCATCCAGCAGATGAATCCTGGAGCAGTGAACG                                                                   |
|                         | SRK1-KD(Lim)       | ATGAAACAG-----CAAGTAAAGCAGTTGGACGACGATGAATCCTGGACGGTGAAC                                                                   |
|                         | SRK8-KD(Lim)       | ATGAACTTGATCCTTCATCAAGTAGGCAGTGTGACGACGATCAATCCTGGAGCGTGAAC                                                                |
|                         | SRK10-KD(Lim)      | ATGCAATAATCCTTCCTCAGTAGGCATCCAGCA-CGATGAATCCTGGAGCAGTGAACG                                                                 |
|                         | SRK16-KD(Lim)      | ATGCAATAATCCTTCCTCAGTAGGCCTCCAGCAGATGAATCCTGGAGCAGTGAACG                                                                   |
|                         | SRK18-KD(Lim)      | ATGAACTAGATCCTTCAGCAAGTAGGCAGTGTGATGACGATGAATCCTGGAGCGTGAACG                                                               |
| c                       | SRK1-KD(Haseyama)  | 993                                                                                                                        |
|                         | SRK2-KD(Haseyama)  | 984                                                                                                                        |
|                         | SRK4-KD(Haseyama)  | 1036                                                                                                                       |
|                         | SRK5-KD(Haseyama)  | 1344                                                                                                                       |
|                         | SRK17-KD(Haseyama) | 979                                                                                                                        |
|                         | SRK18-KD(Haseyama) | 1164                                                                                                                       |
|                         | SRK23-KD(Haseyama) | 1020                                                                                                                       |
|                         | SRK31-KD(Haseyama) | 963                                                                                                                        |
|                         | SRK7-KD(Kim)       | 823                                                                                                                        |
|                         | SRK10-KD(Kim)      | 824                                                                                                                        |
|                         | SRK16-KD(Kim)      | 824                                                                                                                        |
|                         | SRK17-KD(Kim)      | 824                                                                                                                        |
|                         | SRK11-KD(Lim)      | 1020                                                                                                                       |
|                         | SRK29-KD(Lim)      | 1021                                                                                                                       |
|                         | SRK1-KD(Lim)       | 1014                                                                                                                       |
|                         | SRK8-KD(Lim)       | 995                                                                                                                        |
|                         | SRK10-KD(Lim)      | 970                                                                                                                        |
|                         | SRK16-KD(Lim)      | 997                                                                                                                        |
|                         | SRK18-KD(Lim)      | 1027                                                                                                                       |

Figure S3. Continued.



| HV III-2     |                  |                                                                                                                              |
|--------------|------------------|------------------------------------------------------------------------------------------------------------------------------|
| a            | SLG1 (Sakamoto)  | TGAGCAGCGGGATCTAAGAGACCCGTCAGGTGGGTGTATAAGGAGGGCGCGCTTAGCTGCAGTGGTGAT-----GGTTTTACAGGATGAAGAAATGAAGTTGCCAGAACTACGA1085       |
|              | SLG2 (Sakamoto)  | TGAGCAGTGGGATCTGAAAAGCTGGTCAGGTGGGTGTATAAGGAGGACGCGCTTAGCTGCAGTAGAGAT-----GGTTTTACAGGATGAAGAACGTGAAGTTGCCAGAACTACGA1076      |
|              | SLG3 (Sakamoto)  | TGAGCAGTGGGCTCTGAGAACTCTCAATAAGTGGGTGTATAAGGAGGACGCGCTTAGCTGCAGTGGTGAT-----GGTTTTACAGGATGAAGAAATGAAGTTGCCAGAACTGCGA1079      |
|              | SLG4 (Sakamoto)  | TGAGCAGTGGGCTCTGAGAACTCTCGATAAGTGGGTGTAAAAGGAGGACGCGCTTAGCTGCAGTGGTGATGGCTTTACAGGATGAAGAAATGAAGTTGCCAGAACTACGA1091           |
|              | SLG5 (Sakamoto)  | TGAGCAGTGGGATCTGAGAGTCTGGGCAAGTGGGTGTATAAGGAGGACGCGCTTAGCTGCAGTGGAGAT-----GGTTTTACAGGATGAAGAAATGAAGTTGCCAGAACTACGA1082       |
|              | SLG7 (Sakamoto)  | TGATCAGTGGGATCTGGGAGACGGGTAGGTGGATGTATAAGGAGGACGCGCTTAGCTGCAGTGGAGAT-----GGTTTTACAGGATGAAGAAATGAAGTTGCCAGAACTACGA1105        |
|              | SLG8 (Sakamoto)  | TGAGCAGTGGGATCTGAGAGACGGGTAGGTGGGTGTATCAGAGGACGCGCTTAGCTGCAGTGGTGAT-----GGTTTTACAGGATGAAGAAATGAAGTTGCCAGAACTACGA1085         |
|              | SLG18 (Haseyama) | TGAGCAGTGGGATCTGAAAAGCTGGTCAGGTGGGTGTATAAGGAGGACGCGCTTAGCTGCAGTGGAGAT-----GGTTTTACAGGATGAAGAAATGAAGTTGCCAGAACTACGA583        |
| b            | SLG25 (Haseyama) | AGAGCAGTGGGATCTGAGAGAACCGTCAAGTGGGTGTATAAGGAGGACGCGCTTAGCTGCAGTGGTGAT-----AGCTTTACAGGATGAAGAAATGAAGTTGCCAGAACTACGA588        |
|              | SLG31 (Haseyama) | AGAGCAGTGGTATCTGAGAGACTGGTCAAGTGGGTGTACAAAGGAGGACGCGCTTAGCTGCAGTGGGAT-----GTTTTTACTAGGATGAAGAAATGAAGTTGCCAGAACTACGA592       |
|              | SLG1 (Lim)       | TGAAAAAGTGGAACTGAGATCCCACTCAGTGGGTGTATAAGGAGGACGCGCTTAGCTGCAGTGGGAT-----GGTTTTACAGGATGAAGAAATGAAGTTGCCAGAACTACGA1032         |
| c            | SLG8 (Lim)       | TGAGCAGTGGGATCAGAGATCCTGGTCAGTGGGTGTATAAGGAGGACGCTGCTTAGCTGCAGTGGAGAT-----GGTTTTACAGGATGAAGAAATGAAGTTGCCAGAACTACGA1104       |
|              | SLG10 (Lim)      | AAAGCAGTGGGATATGCAAGATTGGTCAAGCGGGTGTATAAGGAGGACGCGCTTAGCTGCAGTGGTGAT-----GGTTTTACAGGATGAAGAAATGAAGTTGCCAGAGACTACGA1039      |
|              | SLG16 (Lim)      | TGATCAGTGGGATCTGGGAGACGGGTAGGTGGATGTATAAGGAGGACGCGCTTAGCTGCAGTGGAGAT-----GGTTTTACAGGATGAAGAAATGAAGTTGCCAGAACTACGA995         |
|              | SLG18 (Lim)      | TGAGCAGTGGGATCTGAGAGCCTGGTCAGGTGGGTGTATAAGGAGGACGCGCTTAGCTGCAGTAGAGAT-----GGTTTTACAGGATGAAGAAATGAAGTTGCCAGAACTACTA1062       |
| * * * *      |                  |                                                                                                                              |
| a            | SLG1 (Sakamoto)  | TGGCTATTGTGACAGGAGTATTGGTGTGAAAAGATGTGAGAGAGGTGCCTTAGCGACTGTAAATTGTACCGGTTTGCAAAATGCGGATATCCGGAATGGTGGGACGGCTGTGTGATTT1205   |
|              | SLG2 (Sakamoto)  | TGGCTATTGTGACCGCAGTATTGGTGTGAAAAGATGTGAGAGAGGTGCCTTAGCGACTGTAAATTGTACCGGTTTGCAAAATGCGGATATCCGGAATGGTGGGACGGGTGTGTGATTT1196   |
|              | SLG3 (Sakamoto)  | TGGCTATTGTGACCGGAGTATTGGTGTGAAAAGATGTGAGAGAGGTGCCTTAGCGACTGTAAATTGTACCGGTTTGCAAAATGCGGATATCCGGAATGGTGGGACAGGTGTGCTAAATTT1199 |
|              | SLG4 (Sakamoto)  | TGGCTATTGTGACCGCAGTATTGGTGTGAAAAGATGTGAGAGAGGTGCCTTAGCGACTGTAAATTGTACCGGTTTGCAAAATGCGGATATCAGAAACCGTGGGACAGGCTGTGTGATTT1211  |
|              | SLG7 (Sakamoto)  | TGGCAGCTGTGACCGGAGTATTGGTGTGAAAAGATGTGAGAGAGGTGCCTTAGCGACTGTAAATTGTACCGGTTTGCAAAATGCTGATATCCGGAATGGTGGGACGGGTGTGTGATTT1202   |
|              | SLG8 (Sakamoto)  | TGGCAGCTGTGACCGCAGTATTGGTGTGAAAAGATGTGAGAGAGGTGCCTTAGCGACTGTAAATTGTACCGGTTTGCAAAATGCGGATATCCGGAATGGTGGGACAGGTGTGTGATTT1225   |
|              | SLG18 (Haseyama) | TGGCAGCTGTGACCGCAGTATTGGTGTGAAAAGATGTGAGAGAGGTGCCTTAGCGACTGTAAATTGTACCGGTTTGCAAAATGCTGATGTCCGGAATGGTGGGACGGGTGTGTGATTT1205   |
|              | SLG18 (Haseyama) | TGGCTATTGTGACCGCAGTATTGGTGTGAAAAGATGTGAGAGAGGTGCCTTAGCGACTGTAAATTGTACCGGTTTGCAAAATGCGGATATCCGGAATGGTGGGACGGGTGTGTGATTT703    |
| b            | SLG25 (Haseyama) | TGGCAGCTGTGACCGCAGTATTGATGTGAAAAGATGTGAGAGAGGTGCCTTAGCGACTGTAAATTGTACCGGTTTGCAAAATGCGGATATCCGGAATGGTGGGACGGGTGTGTGATTT688    |
|              | SLG31 (Haseyama) | TGGCAATTGTGACCGCAGTATTGGTGTGAAAAGATGTGAGAGAGGTGCCTTAGCGACTGTAAATTGTACCGGTTTGCAAAATGCGGATATCAGAAACCGTGGGACAGGCTGTGTGATTT712   |
|              | SLG1 (Lim)       | TGGCAGCTGTGACCGCAGTATTGGTGTGAAAAGATGTGAGAGAGGTGCCTTAGCGACTGTAAATTGTACCGGTTTGCAAAATGCTGATATCCGGAATGGTGGGACGGGATGTGTGATTT1152  |
| c            | SLG8 (Lim)       | TGGCAGCTGTGACCCCAATATTGGTGTGAAAAGATGTGAGAGAGGTGCCTTAGCGACTGTAAATTGTACCGGTTTGCAAAATGCGGATATCAGAAACCGTGGGACAGGCTGTGTGAG---1221 |
|              | SLG10 (Lim)      | TGGCAGTGTGACCGGAGTATTGGTGTGAAAAGATGTGAGAGAGGTGCCTTAGCGACTGTAAATTGTACCGGTTTGCAAAATGCGGATATCCGGAATGGTGGGACGGGTGTGTGATTT1159    |
|              | SLG16 (Lim)      | TGGCAGCTGTGACCCCAATATTGGTGTGAAAAGATGTGAGAGAGGTGCCTTAGCGACTGTAAATTGTACCGGTTTGCAAAATGCGGATATCCGGAATGGTGGGACAGGTGTGTGATTT1115   |
|              | SLG18 (Lim)      | TGGCAGCTGTCAACCGCAGTATTGGTGTGAAAAGATGTGAGAGAGGTGCCTTAGCGATTGTAAATTGTACCGGTTTGCAAAATGCTGATATCCGGAATGGTGGGACGGGTGTGTGATTT1182  |
| **** * * * * |                  |                                                                                                                              |
| a            | SLG1 (Sakamoto)  | GGACAGGAGAGCTCGAGGATATCCGGACCTACCTTGCTGACGGTCAAGATCTTTATGTCGATTGGCTGCTGCTGACCTTGTTT1289                                      |
|              | SLG2 (Sakamoto)  | GGACCGGAGCGCTTGAGGATATCCGGACTTACTTTGCTGAAGGTCAAGATCTTTATGTCGATTGGCTGCTGCTGACCTTGTTT1280                                      |
|              | SLG3 (Sakamoto)  | GGACCGGAGCGCTTGACGATATCGGGAATTACGTTACTGACGGTCAAGATCTTTATGTCGATTGGCAGCTGCTGACCTTGTTT1283                                      |
|              | SLG4 (Sakamoto)  | GGACCGGAGCAGCTTGACGATATCGGGAATTACGTTGCTGACGGTCAAGATCTTTATGTCGATTGGCTGCTGCTGACCTTGTTT1295                                     |
|              | SLG5 (Sakamoto)  | GGACCGGAGCGCTTGAGGATATCCGGACTTACTTTGCTGAAGGTCAAGATCTTTATGTCGATTGGCTGCTGCTGACCTTGTTT1286                                      |
|              | SLG7 (Sakamoto)  | GGACCGGAGCGCTTGACGATATCGGGAATTACGTTGCTGACGGTCAAGATCTTTATGTCGATTGGCTGCTGCTGACCTTGTTT1309                                      |
|              | SLG8 (Sakamoto)  | GGACCGGAAAGCTTGATGATATCAGGAATTATTTGAAAGACGGGCAAGATCTTTATGTCGATTGGCTGCTGCTGACCTTGTTT1289                                      |
|              | SLG18 (Haseyama) | GGACCGGAGCGCTTGAGGATATCCGGACTTACTTTGCTGAAGGTCAAGATCTTTATGTC-----762                                                          |
| b            | SLG25 (Haseyama) | GGACCGGAGATCTCGAGGATATCCGGACATACCATGCCGAAGGTCAAGATCTTTATGTCAGTGGCTGCT-----759                                                |
|              | SLG31 (Haseyama) | GGACCGGAGACCTTGACGATATCGGGAATTACGTTGGTGAAGGTCAAGATCTTTATGTC-----771                                                          |
|              | SLG8 (Lim)       | GGACCGGAGAGCTCGAGGATATCCGGACTTACGTTGCTGACGGTCAAGATCTTTATGTCAGATTGG-----1220                                                  |
| c            | SLG10 (Lim)      | -----1221                                                                                                                    |
|              | SLG16 (Lim)      | GGACAGGAGAGCTCGAGGATATCCGGACCTACCTTGCTGACGCG-----1202                                                                        |
|              | SLG18 (Lim)      | GGACCGGAGCGCTTGACGATATCGGGAATTACGTTGCTGACGGTCAAGATCTTT-----1168                                                              |
|              | SLG18 (Lim)      | GGACCGGAGCGCTTACGATATCGGGAATTACGTTGCTGACGGTCAAGATCTTT-----1235                                                               |

Figure S4. Continued.

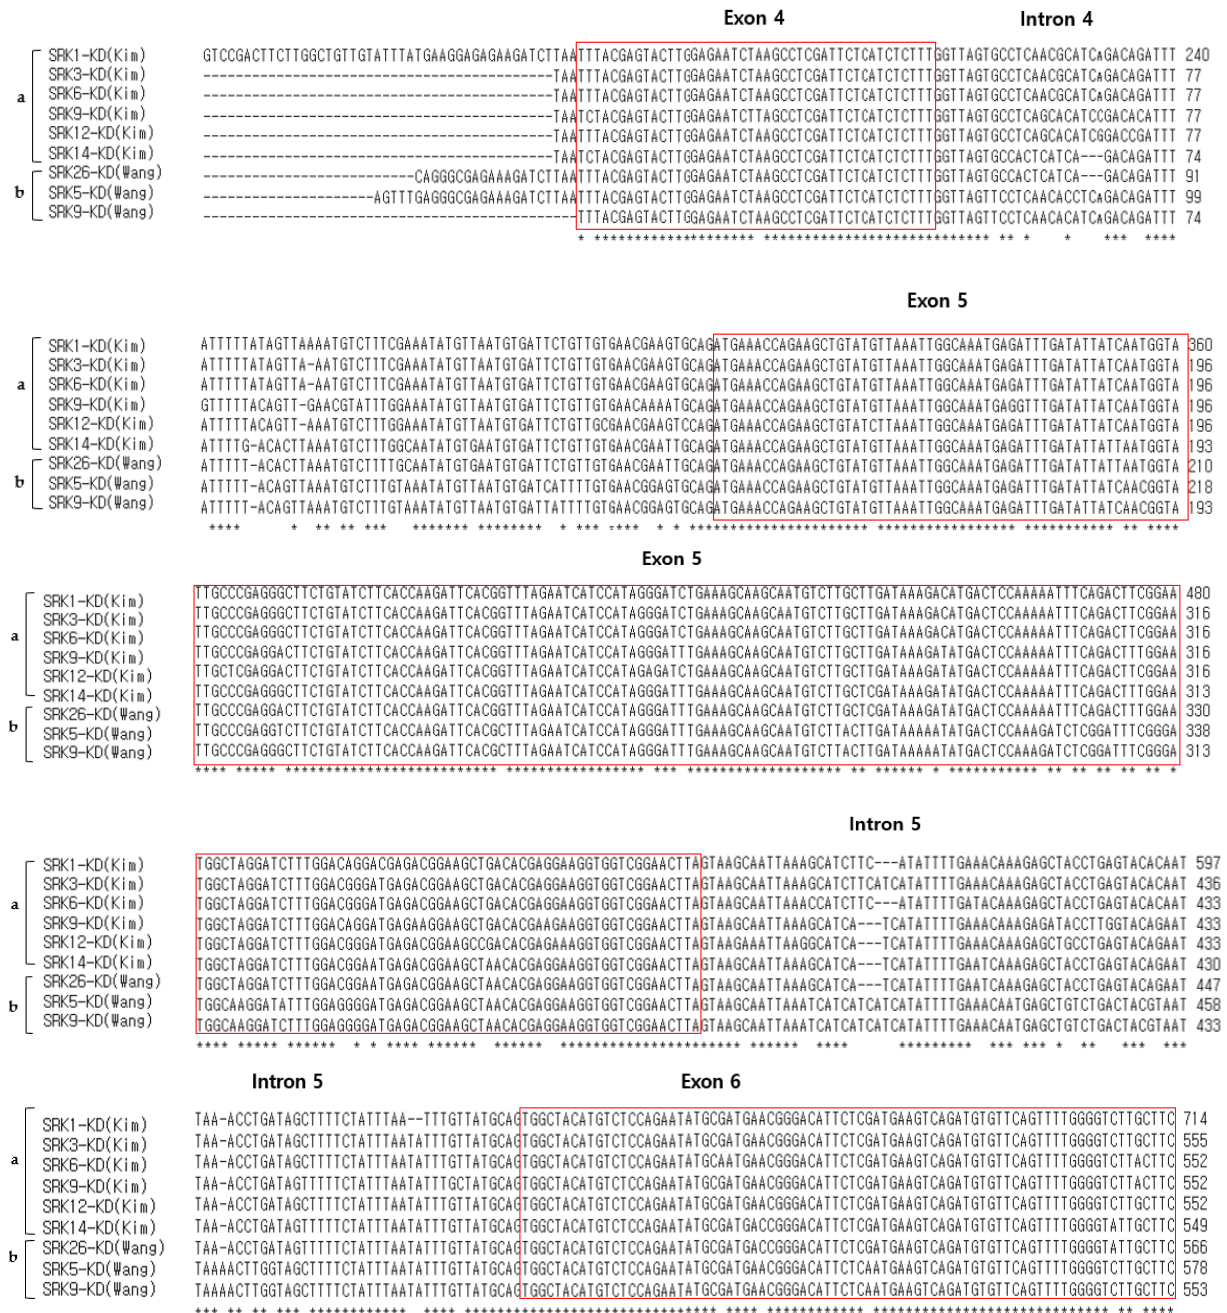

**Figure S5.** Multiple sequence alignment of the nucleotide sequences of the 9 class II S haplotype kinase domain of SRK alleles; a: S haplotype published by Kim (2016); b: S haplotype published by Haseyama (2018); c: S haplotype published by Lim (2002); Red box: 4<sup>th</sup> to 7<sup>th</sup> exons of the SRK; Asterisk: conserved nucleotide.



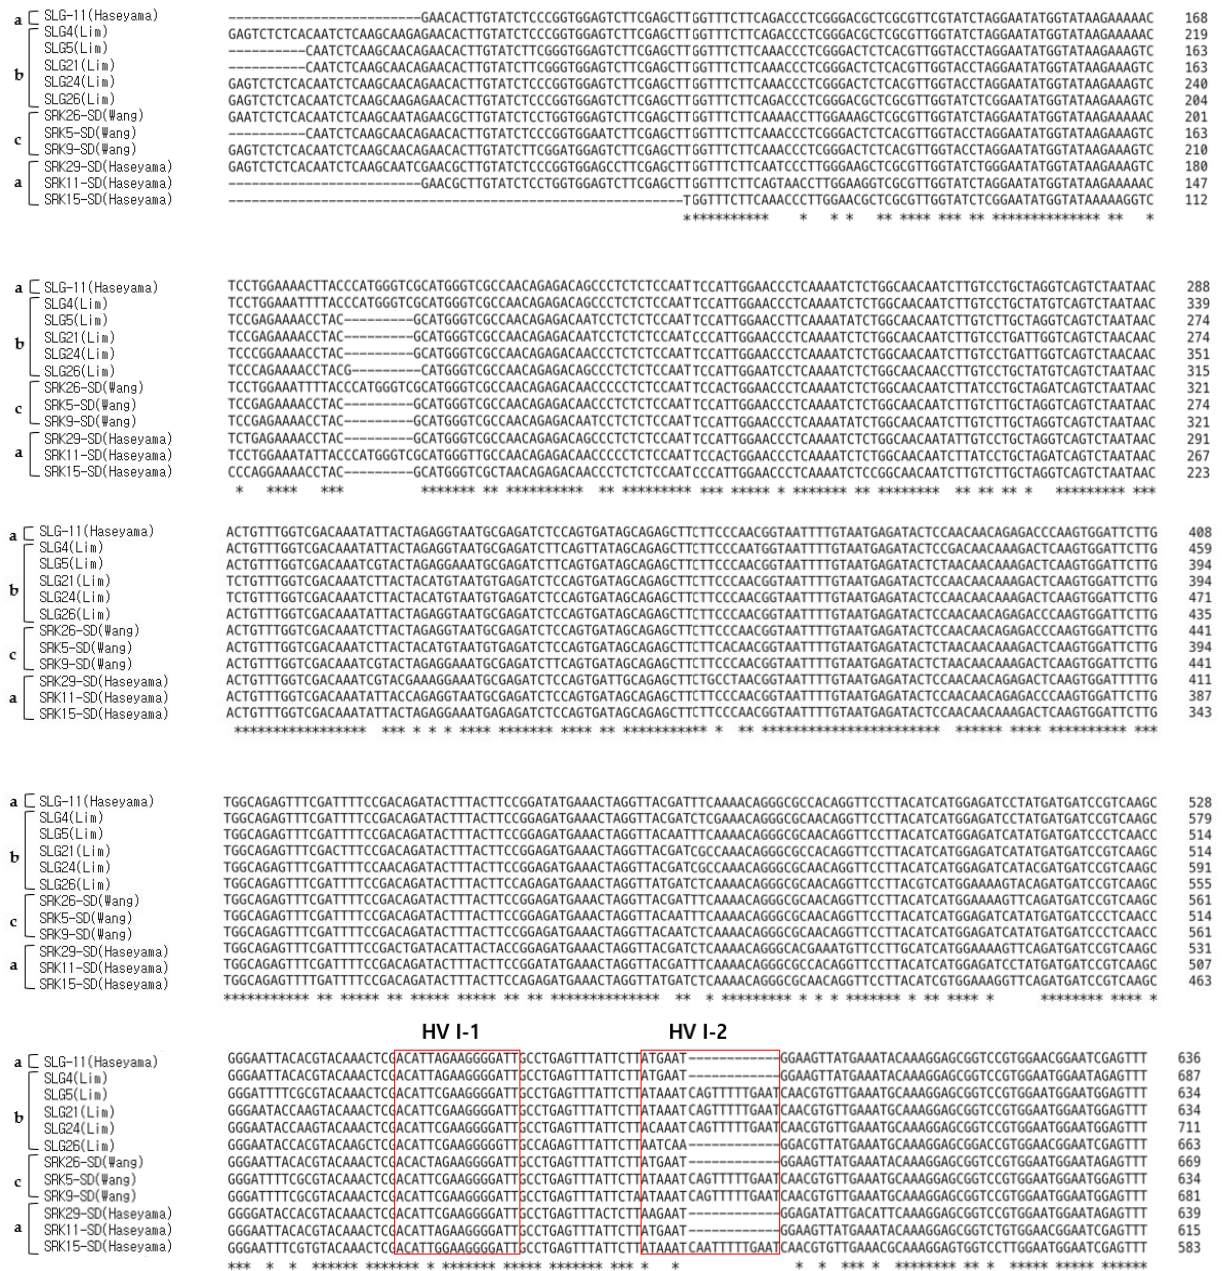

**Figure S6.** Multiple sequence alignment of the nucleotide sequences of the 12 class II S haplotype SLG and S domain of SRK alleles; a: S haplotype published by Haseyama (2018); b: S haplotype published by Lim (2002); c: S haplotype published by Wang (2018); Red box: hypervariable region I to III of SLG; Asterisk: conserved nucleotide.

**Figure S6. Continued.**

|       |                  |                                                                                                                          |     |
|-------|------------------|--------------------------------------------------------------------------------------------------------------------------|-----|
| a     | SRK10(Lim)       | AATTCTTGCGCTGTTGCATTGACGCGGACGAGAGATGCTGATATATGAGTATTTGGAAAAATCAAGCCTGGATTATTTCTCTTCGCTTAGACTCTCATCTCTTCCAAAGCTCTATACAA  | 180 |
|       | SRK11(Lim)       | AATTCTTGCGCTGTTGCATTGACGCGGACGAGAGATGCTGATATATGAGTATTTGGAAAAATCAAGCCTGGATTATTTCTCTTCGCTTAGACTCTCATCTCTTCCAAAGCTCTATACAA  | 177 |
|       | SRK16(Lim)       | AATTCTTGCGCTGTTGCATTGACGCGGACGAGAGATGCTGATATATGAGTATTTGGAAAAATCAAGCCTGGATTATTTCTCTTCGCTTAGACTCTCATCTCTTCCAAAGCTCTATACAA  | 177 |
|       | SRK20(Lim)       | AATTCTTGCGCTGTTGCATTGACGCGGACGAGAGATGCTGATATATGAGTATTTGGAAAAATCAAGCCTGGATTATTTCTCTTCGCTTAGACTCTCATCTCTTCCAAAGCTCTATACAA  | 177 |
|       | SRK29(Lim)       | AATTCTTGCGCTGTTGCATTGACGCGGACGAGAGATGCTGATATATGAGTATTTGGAAAAATCAAGCCTGGATTATTTCTCTTCGCTTAGACTCTCATCTCTTCCAAAGCTCTATACAA  | 177 |
| b     | SRK-22(Haseyama) | AATTCTTGCGCTGTTGCATTGACGCGGACGAGAGATGCTGATATATGAGTATTTGGAAAAATCAAGCCTGGATTATTTCTCTTCGCTTAGACTCTCATCTCTTCCAAAGCTCTATACAA  | 128 |
|       | SRK-23(Haseyama) | AATTCTTGCGCTGTTGCATTGACGCGGACGAGAGATGCTGATATATGAGTATTTGGAAAAATCAAGCCTGGATTATTTCTCTTCGCTTAGACTCTCATCTCTTCCAAAGCTCTATACAA  | 176 |
|       | SRK-31(Haseyama) | -AATTCTTGCGCTGTTGCATTGACGCGGACGAGAGATGCTGATATATGAGTATTTGGAAAAATCAAGCCTGGATTATTTCTCTTCGCTTAGACTCTCATCTCTTCCAAAGCTCTATACAA | 119 |
|       | SRK7(Kim)        | -----TGATATATGAGTATTTGGAAAAATCAAGCCTGGATTATTTCTCTTCGCTTAGACTCTCATCTCTTCCAAAGCTCTATACAA                                   | 82  |
| c     | SRK10(Kim)       | -----TGATATATGAGTATTTGGAAAAATCAAGCCTGGATTATTTCTCTTCGCTTAGACTCTCATCTCTTCCAAAGCTCTATACAA                                   | 82  |
|       | SRK16(Kim)       | -----TGATATATGAGTATTTGGAAAAATCAAGCCTGGATTATTTCTCTTCGCTTAGACTCTCATCTCTTCCAAAGCTCTATACAA                                   | 82  |
|       | SRK17(Kim)       | -----TGATATATGAGTATTTGGAAAAATCAAGCCTGGATTATTTCTCTTCGCTTAGACTCTCATCTCTTCCAAAGCTCTATACAA                                   | 82  |
| ***** |                  |                                                                                                                          |     |
| a     | SRK10(Lim)       | CAGTTGAATGTTGATAGAAATAAGCTAACTGATTGGCTGTGATAATTCTTAGGAAAAAGCGAAGCTCTAATTTAAATTTGGAAGGACAGGTTGCCATTACAAATGGTGTGCTCGAG     | 300 |
|       | SRK11(Lim)       | CAGTTGAATGTTGATAGAAATAAGCTAACTGATTGGCTGTGATAATTCTTAGGAAAAAGCGAAGCTCTAATTTAAATTTGGAAGGACAGGTTGCCATTACAAATGGTGTGCTCGAG     | 296 |
|       | SRK16(Lim)       | CAGTTGAATGTTGATAGAAATAAGCTAACTGATTGGCTGTGATAATTCTTAGGAAAAAGCGAAGCTCTAATTTAAATTTGGAAGGACAGGTTGCCATTACAAATGGTGTGCTCGAG     | 297 |
|       | SRK20(Lim)       | CAATTGAATGTTGATAGAAATAAGCTAACTGATTGGCTGTGATAATTCTTAGGAAAAAGCGAAGCTCTAATTTAAATTTGGAAGGACAGGTTGCCATTACAAATGGTGTGCTCGAG     | 297 |
|       | SRK29(Lim)       | CAGTTGAATGTTGATAGAAATAAGCTAACTGATTGGCTGTGATAATTCTTAGGAAAAAGCGAAGCTCTAATTTAAATTTGGAAGGACAGGTTGCCATTACAAATGGTGTGCTCGAG     | 297 |
| b     | SRK-22(Haseyama) | CAGTTGAATGTTGATAGAAATAAGCTAACTGATTGGCTGTGATAATTCTTAGGAAAAAGCGAAGCTCTAATTTAAATTTGGAAGGACAGGTTGCCATTACAAATGGTGTGCTCGAG     | 248 |
|       | SRK-23(Haseyama) | CAATTGAATGTTGATAGAAATAAGCTAACTGATTGGCTGTGATAATTCTTAGGAAAAAGCGAAGCTCTAATTTAAATTTGGAAGGACAGGTTGCCATTACAAATGGTGTGCTCGAG     | 296 |
|       | SRK-31(Haseyama) | CAGTTGAATGTTGATAGAAATAAGCTAACTGATTGGCTGTGATAATTCTTAGGAAAAAGCGAAGCTCTAATTTAAATTTGGAAGGACAGGTTGCCATTACAAATGGTGTGCTCGAG     | 239 |
|       | SRK7(Kim)        | CAGTTGAATGTTGATAGAAATAAGCTAACTGATTGGCTGTGATAATTCTTAGGAAAAAGCGAAGCTCTAATTTAAATTTGGAAGGACAGGTTGCCATTACAAATGGTGTGCTCGAG     | 201 |
| c     | SRK10(Kim)       | CAATTGAATGTTGATAGAAATAAGCTAACTGATTGGCTGTGATAATTCTTAGGAAAAAGCGAAGCTCTAATTTAAATTTGGAAGGACAGGTTGCCATTACAAATGGTGTGCTCGAG     | 202 |
|       | SRK16(Kim)       | CAGTTGAATGTTGATAGAAATAAGCTAACTGATTGGCTGTGATAATTCTTAGGAAAAAGCGAAGCTCTAATTTAAATTTGGAAGGACAGGTTGCCATTACAAATGGTGTGCTCGAG     | 202 |
|       | SRK17(Kim)       | CAGTTGAATGTTGATAGAAATAAGCTAACTGATTGGCTGTGATAATTCTTAGGAAAAAGCGAAGCTCTAATTTAAATTTGGAAGGACAGGTTGCCATTACAAATGGTGTGCTCGAG     | 202 |
| ** *  |                  |                                                                                                                          |     |
| a     | SRK10(Lim)       | GGCTTTGATATCTTCATCAAGACTCCCGGTTTAGGATAATCCACAGGGATATGAAAGCAGGTAACATTTTGCTAGATAAAAAATGATCCCAAGATCTCGGATTTTGGGCTGGCCAGAA   | 420 |
|       | SRK11(Lim)       | GGCTTTGATATCTTCATCAAGACTCCCGGTTTAGGATAATCCACAGGGATATGAAAGCAGGTAACATTTTGCTAGATAAAAAATGATCCCAAGATCTCGGATTTTGGGCTGGCCAGAA   | 416 |
|       | SRK16(Lim)       | GGCTTTGATATCTTCATCAAGACTCCCGGTTTAGGATAATCCACAGGGATATGAAAGCAGGTAACATTTTGCTAGATAAAAAATGATCCCAAGATCTCGGATTTTGGGCTGGCCAGAA   | 417 |
|       | SRK20(Lim)       | GGCTTTGATATCTTCATCAAGACTCCCGGTTTAGGATAATCCACAGGGATATGAAAGCAGGTAACATTTTGCTAGATAAAAAATGATCCCAAGATCTCGGATTTTGGGCTGGCCAGAA   | 417 |
|       | SRK29(Lim)       | GGCTTTGATATCTTCATCAAGACTCCCGGTTTAGGATAATCCACAGGGATATGAAAGCAGGTAACATTTTGCTAGATAAAAAATGATCCCAAGATCTCGGATTTTGGGCTGGCCAGAA   | 417 |
| b     | SRK-22(Haseyama) | GGCTTTGATATCTTCATCAAGACTCCCGGTTTAGGATAATCCACAGGGATATGAAAGCAGGTAACATTTTGCTAGATAAAAAATGATCCCAAGATCTCGGATTTTGGGCTGGCCAGAA   | 368 |
|       | SRK-23(Haseyama) | GGCTTTGATATCTTCATCAAGACTCCCGGTTTAGGATAATCCACAGGGATATGAAAGCAGGTAACATTTTGCTAGATAAAAAATGATCCCAAGATCTCGGATTTTGGGCTGGCCAGAA   | 416 |
|       | SRK-31(Haseyama) | GGCTTTGATATCTTCATCAAGACTCCCGGTTTAGGATAATCCACAGGGATATGAAAGCAGGTAACATTTTGCTAGATAAAAAATGATCCCAAGATCTCGGATTTTGGGCTGGCCAGAA   | 359 |
|       | SRK7(Kim)        | GGCTTTGATATCTTCATCAAGACTCCCGGTTTAGGATAATCCACAGGGATATGAAAGCAGGTAACATTTTGCTAGATAAAAAATGATCCCAAGATCTCGGATTTTGGGCTGGCCAGAA   | 321 |
| c     | SRK10(Kim)       | GGCTTTGATATCTTCATCAAGACTCCCGGTTTAGGATAATCCACAGGGATATGAAAGCAGGTAACATTTTGCTAGATAAAAAATGATCCCAAGATCTCGGATTTTGGGCTGGCCAGAA   | 322 |
|       | SRK16(Kim)       | GGCTTTGATATCTTCATCAAGACTCCCGGTTTAGGATAATCCACAGGGATATGAAAGCAGGTAACATTTTGCTAGATAAAAAATGATCCCAAGATCTCGGATTTTGGGCTGGCCAGAA   | 322 |
|       | SRK17(Kim)       | GGCTTTGATATCTTCATCAAGACTCCCGGTTTAGGATAATCCACAGGGATATGAAAGCAGGTAACATTTTGCTAGATAAAAAATGATCCCAAGATCTCGGATTTTGGGCTGGCCAGAA   | 322 |
| ***** |                  |                                                                                                                          |     |
| a     | SRK10(Lim)       | TCATTGCAAGGGACCAAACTGAAGCTAGCAGAGATAATCCGATCGGAACCTAGTAAGCAAACTCTTAAAGATATTTCTTACCCATAACTCTATAGAAGCTCATGACCTCTAAGTTCAAAT | 540 |
|       | SRK11(Lim)       | TCATTGCAAGGGACCAAACTGAAGCTAGCAGAGATAATCCGATCGGAACCTAGTAAGCAAACTCTTAAAGATATTTCTTACCCATAACTCTATAGAAGCTCATGACCTCTAAGTTCAAAT | 536 |
|       | SRK16(Lim)       | TCATTGCAAGGGACCAAACTGAAGCTAGCAGAGATAATCCGATCGGAACCTAGTAAGCAAACTCTTAAAGATATTTCTTACCCATAACTCTATAGAAGCTCATGACCTCTAAGTTCAAAT | 537 |
|       | SRK20(Lim)       | TCATTGCAAGGGACCAAACTGAAGCTAGCAGAGATAATCCGATCGGAACCTAGTAAGCAAACTCTTAAAGATATTTCTTACCCATAACTCTATAGAAGCTCATGACCTCTAAGTTCAAAT | 537 |
|       | SRK29(Lim)       | TCATTGCAAGGGACCAAACTGAAGCTAGCAGAGATAATCCGATCGGAACCTAGTAAGCAAACTCTTAAAGATATTTCTTACCCATAACTCTATAGAAGCTCATGACCTCTAAGTTCAAAT | 537 |
| b     | SRK-22(Haseyama) | TCATTGCAAGGGACCAAACTGAAGCTAGCAGAGATAATCCGATCGGAACCTAGTAAGCAAACTCTTAAAGATATTTCTTACCCATAACTCTATAGAAGCTCATGACCTCTAAGTTCAAAT | 488 |
|       | SRK-23(Haseyama) | TCATTGCAAGGGACCAAACTGAAGCTAGCAGAGATAATCCGATCGGAACCTAGTAAGCAAACTCTTAAAGATATTTCTTACCCATAACTCTATAGAAGCTCATGACCTCTAAGTTCAAAT | 536 |
|       | SRK-31(Haseyama) | TCATTGCAAGGGACCAAACTGAAGCTAGCAGAGATAATCCGATCGGAACCTAGTAAGCAAACTCTTAAAGATATTTCTTACCCATAACTCTATAGAAGCTCATGACCTCTAAGTTCAAAT | 479 |
|       | SRK7(Kim)        | TCATTGCAAGGGACCAAACTGAAGCTAGCAGAGATAATCCGATCGGAACCTAGTAAGCAAACTCTTAAAGATATTTCTTACCCATAACTCTATAGAAGCTCATGACCTCTAAGTTCAAAT | 441 |
| c     | SRK10(Kim)       | TCATTGCAAGGGACCAAACTGAAGCTAGCAGAGATAATCCGATCGGAACCTAGTAAGCAAACTCTTAAAGATATTTCTTACCCATAACTCTATAGAAGCTCATGACCTCTAAGTTCAAAT | 442 |
|       | SRK16(Kim)       | TCATTGCAAGGGACCAAACTGAAGCTAGCAGAGATAATCCGATCGGAACCTAGTAAGCAAACTCTTAAAGATATTTCTTACCCATAACTCTATAGAAGCTCATGACCTCTAAGTTCAAAT | 442 |
|       | SRK17(Kim)       | TCATTGCAAGGGACCAAACTGAAGCTAGCAGAGATAATCCGATCGGAACCTAGTAAGCAAACTCTTAAAGATATTTCTTACCCATAACTCTATAGAAGCTCATGACCTCTAAGTTCAAAT | 442 |
| ***** |                  |                                                                                                                          |     |
| a     | SRK10(Lim)       | TTTTGCTACTCAGCGGCTACATGTCTCCGAGTAGCAATGTATGGGATCTCTCCGAAA AAACAGATGTTTTCAGTTTGGAGTCATAGTCTTGAAATTTGTTACTGGAAAAAGGAACA    | 660 |
|       | SRK11(Lim)       | TTTTGCTACTCAGCGGCTACATGTCTCCGAGTAGCAATGTATGGGATCTCTCCGAAA AAACAGATGTTTTCAGTTTGGAGTCATAGTCTTGAAATTTGTTACTGGAAAAAGGAACA    | 656 |
|       | SRK16(Lim)       | TTTTGCTACTCAGCGGCTACATGTCTCCGAGTAGCAATGTATGGGATCTCTCCGAAA AAACAGATGTTTTCAGTTTGGAGTCATAGTCTTGAAATTTGTTACTGGAAAAAGGAACA    | 657 |
|       | SRK20(Lim)       | TTTTGCTACTCAGCGGCTACATGTCTCCGAGTAGCAATGTATGGGATCTCTCCGAAA AAACAGATGTTTTCAGTTTGGAGTCATAGTCTTGAAATTTGTTACTGGAAAAAGGAACA    | 657 |
|       | SRK29(Lim)       | TTTTGCTACTCAGCGGCTACATGTCTCCGAGTAGCAATGTATGGGATCTCTCCGAAA AAACAGATGTTTTCAGTTTGGAGTCATAGTCTTGAAATTTGTTACTGGAAAAAGGAACA    | 657 |
| b     | SRK-22(Haseyama) | TTTTGCTACTCAGCGGCTACATGTCTCCGAGTAGCAATGTATGGGATCTCTCCGAAA AAACAGATGTTTTCAGTTTGGAGTCATAGTCTTGAAATTTGTTACTGGAAAAAGGAACA    | 608 |
|       | SRK-23(Haseyama) | TTTTGCTACTCAGCGGCTACATGTCTCCGAGTAGCAATGTATGGGATCTCTCCGAAA AAACAGATGTTTTCAGTTTGGAGTCATAGTCTTGAAATTTGTTACTGGAAAAAGGAACA    | 656 |
|       | SRK-31(Haseyama) | TTTTGCTACTCAGCGGCTACATGTCTCCGAGTAGCAATGTATGGGATCTCTCCGAAA AAACAGATGTTTTCAGTTTGGAGTCATAGTCTTGAAATTTGTTACTGGAAAAAGGAACA    | 599 |
|       | SRK7(Kim)        | TTTTGCTACTCAGCGGCTACATGTCTCCGAGTAGCAATGTATGGGATCTCTCCGAAA AAACAGATGTTTTCAGTTTGGAGTCATAGTCTTGAAATTTGTTACTGGAAAAAGGAACA    | 561 |
| c     | SRK10(Kim)       | TTTTGCTACTCAGCGGCTACATGTCTCCGAGTAGCAATGTATGGGATCTCTCCGAAA AAACAGATGTTTTCAGTTTGGAGTCATAGTCTTGAAATTTGTTACTGGAAAAAGGAACA    | 562 |
|       | SRK16(Kim)       | TTTTGCTACTCAGCGGCTACATGTCTCCGAGTAGCAATGTATGGGATCTCTCCGAAA AAACAGATGTTTTCAGTTTGGAGTCATAGTCTTGAAATTTGTTACTGGAAAAAGGAACA    | 562 |
|       | SRK17(Kim)       | TTTTGCTACTCAGCGGCTACATGTCTCCGAGTAGCAATGTATGGGATCTCTCCGAAA AAACAGATGTTTTCAGTTTGGAGTCATAGTCTTGAAATTTGTTACTGGAAAAAGGAACA    | 562 |
| ***** |                  |                                                                                                                          |     |

**Figure S7.** Multiple sequence alignment of SRK10 (Lim, AY052579), SRK16 (Lim, AY052579) and other 10 S haplotypes; Asterisk: conserved nucleotide; a: S haplotype published by Lim (2002); b: S haplotype published by Haseyama (2018); c: S haplotype published by Kim (2016).

|          |                  |                                                                                                                             |     |
|----------|------------------|-----------------------------------------------------------------------------------------------------------------------------|-----|
| a        | SRK10(Lin)       | GAGGATTCTACGAGTCAACCCGGAAGACAATCTTGATGCTATGTAAGTTTAAAGAACCAATAATTTCTATCTACTCTCGAGATTGCCAAAAACACTTTAAATGCTTTTATATTATAAA      | 780 |
|          | SRK11(Lin)       | GAGGATTCTACGAGTCAACCCGGAAGACAATCTTGATGCTATGTAAGTTTAAAGAACCAATAATTTCTATCTACTCTCGAGATTGCCAAAAACACTTTAAATGCTTTTATATTATAAA      | 776 |
|          | SRK16(Lin)       | GAGGATTCTACGAGTCAACCCGGAAGACAATCTTGATGCTATGTAAGTTTAAAGAACCAATAATTTCTATCTACTCTCGAGATTGCCAAAAACACTTTAAATGCTTTTATATTATAAA      | 777 |
|          | SRK20(Lin)       | GAGGATTCTACGAGTCAACCCGGAAGACAATCTTGATGCTATGTAAGTTTAAAGAACCAATAATTTCTATCTACTCTCGAGATTGCCAAAAACACTTTAAATGCTTTTATATTATAAA      | 777 |
|          | SRK29(Lin)       | GAGGATTCTACGAGTCAACCCGGAAGACAATCTTGATGCTATGTAAGTTTAAAGAACCAATAATTTCTATCTACTCTCGAGATTGCCAAAAACACTTTAAATGCTTTTATATTATAAA      | 777 |
| b        | SRK-22(Haseyama) | GAGGATTCTACGAGTCAACCCGGAAGACAATCTTGATGCTATGTAAGTTTAAAGAACCAATAATTTCTATCTACTCTCGAGATTGCCAAAAACACTTTAAATGCTTTTATATTATAAA      | 728 |
|          | SRK-23(Haseyama) | GAGGATTCTACGAGTCAACCCGGAAGACAATCTTGATGCTATGTAAGTTTAAAGAACCAATAATTTCTATCTACTCTCGAGATTGCCAAAAACACTTTAAATGCTTTTATATTATAAA      | 776 |
|          | SRK-31(Haseyama) | GAGGATTCTACGAGTCAACCCGGAAGACAATCTTGATGCTATGTAAGTTTAAAGAACCAATAATTTCTATCTACTCTCGAGATTGCCAAAAACACTTTAAATGCTTTTATATTATAAA      | 719 |
| c        | SRK7(Kin)        | GAGGATTCTACGAGTCAACCCGGAAGACAATCTTGATGCTATGTAAGTTTAAAGAACCAATAATTTCTATCTACTCTCGAGATTGCCAAAAACACTTTAAATGCTTTTATATTATAAA      | 681 |
|          | SRK10(Kin)       | GAGGATTCTACGAGTCAACCCGGAAGACAATCTTGATGCTATGTAAGTTTAAAGAACCAATAATTTCTATCTACTCTCGAGATTGCCAAAAACACTTTAAATGCTTTTATATTATAAA      | 682 |
|          | SRK16(Kin)       | GAGGATTCTACGAGTCAACCCGGAAGACAATCTTGATGCTATGTAAGTTTAAAGAACCAATAATTTCTATCTACTCTCGAGATTGCCAAAAACACTTTAAATGCTTTTATATTATAAA      | 682 |
|          | SRK17(Kin)       | GAGGATTCTACGAGTCAACCCGGAAGACAATCTTGATGCTATGTAAGTTTAAAGAACCAATAATTTCTATCTACTCTCGAGATTGCCAAAAACACTTTAAATGCTTTTATATTATAAA      | 682 |
| *****    |                  |                                                                                                                             |     |
| a        | SRK10(Lin)       | CAGGCATGGACTCATTGGGCGCAGGGAAGAGCGCTAGAAATCGTAGATCCCGTCATCGTAGATTCATTGTGCATCAACATTTCAACCAAAAAGAGTCTCTAAAATGCATACAAATTTGGTCTC | 900 |
|          | SRK11(Lin)       | CAGGCATGGACTCATTGGGCGCAGGGAAGAGCGCTAGAAATCGTAGATCCCGTCATCGTAGATTCATTGTGCATCAACATTTCAACCAAAAAGAGTCTCTAAAATGCATACAAATTTGGTCTC | 896 |
|          | SRK16(Lin)       | CAGGCATGGACTCATTGGGCGCAGGGAAGAGCGCTAGAAATCGTAGATCCCGTCATCGTAGATTCATTGTGCATCAACATTTCAACCAAAAAGAGTCTCTAAAATGCATACAAATTTGGTCTC | 897 |
|          | SRK20(Lin)       | CAGGCATGGACTCATTGGGCGCAGGGAAGAGCGCTAGAAATCGTAGATCCCGTCATCGTAGATTCATTGTGCATCAACATTTCAACCAAAAAGAGTCTCTAAAATGCATACAAATTTGGTCTC | 897 |
|          | SRK29(Lin)       | CAGGCATGGACTCATTGGGCGCAGGGAAGAGCGCTAGAAATCGTAGATCCCGTCATCGTAGATTCATTGTGCATCAACATTTCAACCAAAAAGAGTCTCTAAAATGCATACAAATTTGGTCTC | 897 |
| b        | SRK-22(Haseyama) | CAGGCATGGACTCATTGGGCGCAGGGAAGAGCGCTAGAAATCGTAGATCCCGTCATCGTAGATTCATTGTGCATCAACATTTCAACCAAAAAGAGTCTCTAAAATGCATACAAATTTGGTCTC | 848 |
|          | SRK-23(Haseyama) | CAGGCATGGACTCATTGGGCGCAGGGAAGAGCGCTAGAAATCGTAGATCCCGTCATCGTAGATTCATTGTGCATCAACATTTCAACCAAAAAGAGTCTCTAAAATGCATACAAATTTGGTCTC | 896 |
|          | SRK-31(Haseyama) | CAGGCATGGACTCATTGGGCGCAGGGAAGAGCGCTAGAAATCGTAGATCCCGTCATCGTAGATTCATTGTGCATCAACATTTCAACCAAAAAGAGTCTCTAAAATGCATACAAATTTGGTCTC | 839 |
| c        | SRK7(Kin)        | CAGGCATGGACTCATTGGGCGCAGGGAAGAGCGCTAGAAATCGTAGATCCCGTCATCGTAGATTCATTGTGCATCAACATTTCAACCAAAAAGAGTCTCTAAAATGCATACAAATTTGGTCTC | 801 |
|          | SRK10(Kin)       | CAGGCATGGACTCATTGGGCGCAGGGAAGAGCGCTAGAAATCGTAGATCCCGTCATCGTAGATTCATTGTGCATCAACATTTCAACCAAAAAGAGTCTCTAAAATGCATACAAATTTGGTCTC | 802 |
|          | SRK16(Kin)       | CAGGCATGGACTCATTGGGCGCAGGGAAGAGCGCTAGAAATCGTAGATCCCGTCATCGTAGATTCATTGTGCATCAACATTTCAACCAAAAAGAGTCTCTAAAATGCATACAAATTTGGTCTC | 802 |
|          | SRK17(Kin)       | CAGGCATGGACTCATTGGGCGCAGGGAAGAGCGCTAGAAATCGTAGATCCCGTCATCGTAGATTCATTGTGCATCAACATTTCAACCAAAAAGAGTCTCTAAAATGCATACAAATTTGGTCTC | 802 |
| *****    |                  |                                                                                                                             |     |
| a        | SRK10(Lin)       | TTGTGTATTCAAGAACGTGCGGTGCACAGCAACGATGTGTCGCGTGGTTTGGATGCTT                                                                  | 960 |
|          | SRK11(Lin)       | TTATGTATTCAAGAACGTGCGGAGCAGCAAGCAACGATGTGTCGCGTGGTTTGGGTGCTT                                                                | 956 |
|          | SRK16(Lin)       | TTGTGTATTCAAGAACGTGCGGAGCAGCAAGCAACGATGTGTCGCGTGGTTTGGATGCTT                                                                | 957 |
|          | SRK20(Lin)       | TTGTGTATTCAAGAACGTGCGGTGCACAGCAACGATGTGTCGCGTGGTTTGGATGCTT                                                                  | 957 |
|          | SRK29(Lin)       | TTGTGTATTCAAGAACGTGCGGAGCAGCAAGCAACGATGTGTCGCGTGGTTTGGATGCTT                                                                | 957 |
| b        | SRK-22(Haseyama) | TTGTGTATTCAAGAACGTGCGGAGCAGCAAGCAACGATGTGTCGCGTGGTTTGGATGCTT                                                                | 908 |
|          | SRK-23(Haseyama) | TTGTGTATTCAAGAACGTGCGGTGCACAGCAACGATGTGTCGCGTGGTTTGGATGCTT                                                                  | 956 |
|          | SRK-31(Haseyama) | TTGTGTATTCAAGAACGTGCGGAGCAGCAAGCAACGATGTGTCGCGTGGTTTGGATGCTT                                                                | 899 |
| c        | SRK7(Kin)        | TTGTGTATTCAAGAACGTGCGG-----                                                                                                 | 823 |
|          | SRK10(Kin)       | TTGTGTATTCAAGAACGTGCGG-----                                                                                                 | 824 |
|          | SRK16(Kin)       | TTGTGTATTCAAGAACGTGCGG-----                                                                                                 | 824 |
|          | SRK17(Kin)       | TTGTGTATTCAAGAACGTGCGG-----                                                                                                 | 824 |
| ** ***** |                  |                                                                                                                             |     |

Figure S7. Continued.
