# Supplementary material for: Development of S Haplotype-Specific Markers to Identify Genotypes of Self-Incompatibility in Radish (Raphanus sativus L.)
Source: MDPI journal article supplement (doi:10.3390/plants13050725), 2024-03-04
Supplement: s1 [file s1]

**Table S1.** Information of class I, II S haplotype universal primer used in this study.

| Gene            | Primer    | Primer sequence (5' to 3')  | Reference                 |
|-----------------|-----------|-----------------------------|---------------------------|
| Class I         | UVSRK-F   | TGATGAGTTTATGAATGAGGTGA     | Delorme et al., 1995      |
| SRK-KD          | UVSRK-R   | GCTTTCATATTACCGGGCATCGATGA  | Delorme et al., 1995      |
| Class II        | KS2       | GAGGGCGAGAAGATCTTAATT       | Seo et al., 2004          |
| SRK-KD          | KA2       | AAGACKATCATATTACCGAGC       | Seo et al., 2004          |
| Class I<br>SLG  | SLG-I-F   | ATGAAAGGCGTAAGAAAAACCTA     | Lim et al., 2002          |
|                 | SLG-I-R   | CCGTGTTTTATTTTAAGAGAAAGAGCT | Lim et al., 2002          |
|                 | PS22      | ATCGATGGGATGAAAAAGTCATCG    | Sakamoto et al., 1998     |
| Class II<br>SLG | SLG-II-F  | ATGAAAGGGGTACAGAACAT        | Chen and Narsrallah, 1990 |
|                 | SLG-II-R  | CTCAAGTCCCACTGCTGCGG        | Chen and Narsrallah, 1990 |
|                 | PS21      | GTCAAGTCCCACTGCTGCGGG       | Nishio et al., 1996       |
|                 | Rs9SLG-F  | TCTTCCTTGTCTTGTTCTATTTC     | Cho and Kim, 2021         |
|                 | Rs9SLG-R  | ACCCCAGAACATGCTCCAT         | Cho and Kim, 2021         |
|                 | UVSLGII-F | TCATCCTGCCCTTTCGATCTATG     | Designed in this study    |
|                 | UVSLGII-R | AAAACACACAACCCAATCCGCCA     | Designed in this study    |

**Table S2.** Information of 9 S haplotype-specific primer developed in this study.

| Gene      | Primer  | Primer sequence(5' to 3') | GC(%)  | Tm(°C) |
|-----------|---------|---------------------------|--------|--------|
| S1 (Lim)  | KD1-F   | TTGCAAGGGATGAGACGGAA      | 50%    | 55.4°C |
|           | KD1-R   | CCAACTGCTTACTTGCTGTTTCAT  | 41.67% | 56.7°C |
|           | SLG1-F  | CCCGAAGCTTTCCTGAGTTT      | 50%    | 55.4°C |
|           | SLG1-R  | TTTTCCATATTCTGGGATC       | 40%    | 51.3°C |
| S4 (Lim)  | SLG4-F  | TTTTACCCATGGGTCGCAT       | 47.37% | 53.2°C |
|           | SLG4-R  | TGATCTCCTCTCCGTTGTCT      | 50%    | 55.4°C |
| S5 (Lim)  | SLG5-F  | CAATTTCAAAACAGGGCGCAACAGG | 48%    | 60.6°C |
|           | SLG5-R  | TCCACATGAGTAAAGCGGATCG    | 50%    | 58.4°C |
| S8 (Lim)  | KD8-F   | TACCAACATCAGTATCCCATAT    | 36.36% | 52.7°C |
|           | KD8-R   | AATGCATTTAAAGTGTTTGAGCAA  | 29.17% | 51.8°C |
|           | SLG8-F  | GAGACGCAAGTGGATTATTGT     | 42.86% | 54.1°C |
|           | SLG8-R  | ATAAGCGTCATTATCCTCTGTGA   | 39.13% | 54.9°C |
| S10 (Lim) | KD10-F  | AGAGGATTCTACCAGTCAACCC    | 50%    | 58.4°C |
|           | KD10-R  | GGATTCATCGTGTCGGATGGC     | 57.14% | 60.3°C |
|           | SLG10-F | CTACCTATTGCAAAGCGGCG      | 55%    | 57.4°C |
|           | SLG10-R | CGCTCTTCATTCGAGCGATT      | 50%    | 55.4°C |
| S16 (Lim) | SLG16-F | GAATGAGTACCTCAGGGTATT     | 42.86% | 54.1°C |
|           | SLG16-R | CTAACCCGTCTCCAGATC        | 57.89% | 57.3°C |
| S18 (Lim) | KD18-F  | ACGAAACGGAAGCTAGCACA      | 50%    | 55.4°C |
|           | KD18-R  | GTAGAGTTATGGGTTCTCTTTG    | 40.91% | 54.3°C |
|           | SLG18-F | ACTTTCAGTGCATCGGGTT       | 50%    | 55.4°C |
|           | SLG18-R | CTGCTGCACGTTCCAGGGAT      | 60%    | 59.5°C |
| S21 (Lim) | SLG21-F | GTTACGATCGCCAAACAGGGCGCC  | 62%    | 65.3°C |
|           | SLG21-R | CTCCTCACACACCCCTGTGATCCG  | 62%    | 65.3°C |
| S26 (Lim) | SLG26-F | CTTAATCAAGGACGTTATGAAATG  | 33.33% | 53.4°C |
|           | SLG26-R | TAAGCGACCTCCTCACTGTTC     | 52.38% | 58.2°C |

**Table S3.** Result of BLASTN 2.14.1+ using SLG21(Lim) nucleotide sequence to *Raphanus sativus* genome as sembly 'QZ-16' (GCA\_902824885.1). SLG21(Lim) sequence is obtained from 'SJ-21' radish breeding line; Bo ld letters: putative region of SLG21(Lim) and SRK21(Lim) S domain.

| Query                    | Subject (Acc.)                              | Iden (Region)                                | Length      | Mismatch  | E value    | Bit score   |
|--------------------------|---------------------------------------------|----------------------------------------------|-------------|-----------|------------|-------------|
| SLG21 (Lim)<br>(1,055bp) | <b>chromosome: 8</b><br><b>(LR778317.1)</b> | <b>100%</b><br><b>(23369737~23370791)</b>    | <b>1055</b> | <b>0</b>  | <b>0.0</b> | <b>1949</b> |
|                          | <b>chromosome: 8</b><br><b>(LR778317.1)</b> | <b>94.218%</b><br><b>(23333840~23334894)</b> | <b>1055</b> | <b>61</b> | <b>0.0</b> | <b>1611</b> |
|                          | chromosome: 8<br>(LR778317.1)               | 75.373%<br>(23031621~23032018)               | 392         | 85        | 5.91e-44   | 182         |
|                          | chromosome: 2<br>(LR778311.1)               | 81.144%<br>(42830387~42831429)               | 1055        | 167       | 0.0        | 824         |
|                          | chromosome: 2<br>(LR778311.1)               | 76.93%<br>(9982886~9981803)                  | 1055        | 168       | 551        | 1055        |
|                          | chromosome: 1<br>(LR778310.1)               | 77.332%<br>(10017398~10016505)               | 1055        | 150       | 8.65e-137  | 490         |
|                          | chromosome: 1<br>(LR778310.1)               | 85.876%<br>(10029198~10029022)               | 169         | 16        | 2.13e-43   | 180         |
|                          |                                             |                                              |             |           |            |             |
