# Supplementary material for: Development of S Haplotype-Specific Markers to Identify Genotypes of Self-Incompatibility in Radish (Raphanus sativus L.)
Source: Plants (Basel). 2024 Mar 4;13(5):725. doi: 10.3390/plants13050725 (PMC10934505; doi:10.3390/plants13050725)
Supplement: Supplementary file 1 [file plants-13-00725-s001.zip › Table S4. Nucleotide sequences of S allales.xlsx]

## Sheet: Nucelotide sequences of SJ-1~22
Accession number	S haplotype	Class	Nucleotide Sequence
SJ-1~4	S1(Lim)	I	SRK kinase domain (1,063bp)	AACCTTGTCCAAATTCTGGGATGTTGCATTGACGCAGATGAGAAGATTCTGATATATGAGTATTTGGAAAATTTAAGCCTCGATTCTTATCTCTTCGGTTAGAGCATCATTATTTAAATGCTCTATTAACAGTTGAATGTCGGAAGAAATAAGCTAATCTTATTTGGCTGTGATCGATTTGTAGGAAAAACCCAAAGCCCTAAGCTAAATTGGAAGGAGAGATTCGACATTACCAGTGGTGTTGCTCGAGGGCTTTTATATCTTCATCAAGACTCACGGTTTAGGATAATACACAGAGATTTGAAAGTAAGTAACATTTTGCTTGACAAAAATATGATCCCAAAGATTTCGGATTTTGGGATGGCCAGGATATTTGCAAGGGATGAGACGGAAGCTAGC…
			SLG (1,220bp)	TGTTTCGTCCTGCCTTTTCCATGAACACTTTGTCGGCTACCGAATCTCTTACAATCTCAAGCAACAAAACACTTGTATCTCCGGGTAATGTCTTCGAGCTCGGTTTCTTCAGAACCAACTCAAGTTCTCGTTGGTATCTCGGGATATGGTACAAGAAATTGACCAACAGAATCTATGTATGGGTTGCCAACAGAGATAACCCTCTCTCCAGTTCCACTGGAACCCTCAAATTCTCAGGCAATAATCTTGTCCTCCTTGGTGACTCCAATAAATCATTTTGGACAACGAATTTTACTAGAGGAAATGGGAGATCTCCGGTGGTGGCAGAGCTTCTCGCTAATGGAAACTTTGTGATGCGAGACTCAAATAACAACGACTCAAGTGGATTCTTGTGGCAAA…
SJ-5~6	S8(Lim)	I	SRK kinase domain (1,133bp)	CCTTTTTGATTTGAGGATTTTTAGAGAGTACATAGTCGCGAGGCTTCAGCATAAAATCTTGTCCAAATTCTTGGCTGTTGCATTGACGCAAATGAGAAGATGCTGATATACGAGTATTTGGAAAATTTAAGCCTCGATTCTTATCTCTTCGGTTAGAGCCTCATTCTTTTAAAAGCTCTTATACAACAGTTGAACGTAGATAGAAATAGGCTAATCTGATTTGACTGTGATCGATTTTGTAGGAAAAACCCGAAGGCCTAAGCTAAATTGGAAGGAGAGATTCGACATTACAAATGGTGTTGCTCGAGGGCTTTTATATCTTCATCAAGACTCACGGTTTAGGATAATCCACAGAGATTTGAAAGTAAGTAACATTTTACTTGATAAAAATATGATCCC…
			SLG (1,201bp)	TGAAAAGAAAGAAAAAGGTGGGGAGAGAGATGAAAGGCACCTACGATAACTCTTACACCTTATCCTTTTGCCTTGTCTTTTTCGTCTTGATTCTATTTCGTCCTGCCTTTTCGATCAACACTTTGTCGTCTACAGAATCTCTTACAATCTCAAGCAACAGAACACTTGTATCTCCCGGTAATGTCTTCGAGCTCGGTTTCTTCAAAACCACTTCAAGTTCTCGTTGGTATCTAGGGATTTGGTACAAGAACTTATCCGACAGAACCTATGTATGGGTTGCCAACAGAGATAACCCGCTCTTCAGTTCCATTGGAACCCTCAAAATCTCGAACACGAACCTTGTCCTACTTGATCACTCAAATAAATCTGTTTGGTCGATGAATCTTACTAGACGAAATG…
SJ-7~9	S10(Lim)	I	SRK kinase domain (1,051bp)	TGTCCGAATTCTTGGCTGTTGCATTGACGCGGACGAGAAGATGCTGATATATGAGTATTTGGAAAATTCAAGCCTGGATTATTTTCTCTTCGGTTAGACTCTCATTCTTTCGAAAGCTCTATACAACAGTTGAATGTTGATAGAAATAAGCTAACTGATTTGGCTGTGATTAATTCTTAGGAAAAAAGCGAAGCTCTAATTTAAATTGGAAGGACAGGTTCGCCATTACAAATGGTGTTGCTCGAGGGCTTGTATATCTTCATCAAGACTCCCGGTTTAGGATAATCCACAGGGATATGAAAGCAGGTAACATTTTGCTAGATAAAAATATGATCCCAAAGATCTCGGATTTTGGGCTGGCCAGAATCATTGCAAGGGACCAAACTGAAGCTAGCACAG…
			SLG (1,202bp)	CTTCATCCTGCCCTTTCGATGTATTTCAACACTTTGTCGTCTACAGAATCTCTTACAATCTCAAGCAACAGAACACTTGTATCTCCCGGTAATGTCTTCGAGCTTGGTTTCTTCACTCCCGAATCTAGTTCTCGTTGGTATCTCGGGATATGGTACAAGAAATTGTCCGAGAGAACCTATGTATGGGTTTCCAACAGAGATAACCCTCTCTCCAGCTCCATTGGAACCCTCAAAATCTCCAACATGAACCTAGTCCTCCTTGATCACTCCAATAAATCTGTTTGGTCGACGAATCTTACTAGAGGAAATGAGAGATCTCTGGTGGTGGCAGAGCTTCTCGCTAACGGAAACTTCGTGGTACGATACTTCAATAACAACGATACAAGTGGATTCTTGTGG…
SJ-10~11	S16(Lim)	I	SRK kinase domain (1,071bp)	TGATCGCGAGGCTTCAGCATATAACCTTGTCCGAATTCTTGGCTGTTGCATTGACCCAGATGAGAAGATTCTGATATATGAGTATTTGGAAAATTCAAGCCTGGATTATTTTCTCTTCGGTTAGACTCTCATTCTTTCAAAAGCTCTATACAACAGTTGAATGTTGATAGAAATAAGCTAACTGATTTGGCCGTGATTAATTCTTAGGAAAAAAGCGAAGCTCTAATTTAAATTGGAAGGACAGGTTCGCCATTACAAATGGTGTTGCTCGAGGGCTTGTATATCTTCATCAAGACTCCCGGTTTAGGATAATCCACAGGGATATGAAAGCAGGTAACATTTTGCTAGATAAAAATATGATCCCAAAGATCTCGGATTTTGGGCTGGCCAGAATCATTG…
			SLG (1,168bp)	TACAGAATCTCTTACAATCTCAAGCAACAGAACACTTGTATCTCGGGGTGATGTCTTCGAGCTCGGTTTCTTCAGAACCAACTCAAGTTCTAGTTGGTATCTTGGGATATGGTACAAGAAATTGCCCGACAGAACCTATGTGTGGGTTGCTAACAGAGATAACCCTCTATCCAGTTCCATTGGAACCCTCAAAATCTCCAACATGAACCTCGTCCTCCTTGATCACTCTAATAAATCTGTCTGGTCGACGAATGTTACTAGAGGAAATGAGAGATCTCCGGTGGTGGCAGAGCTTCTCGCTAACGGAAACTTCGTGATGCGAAACTCCAATAACAACGAAGCATGTCAATTCTTATGGCAAAGTTTCGATTACCCTACAGATACTTTGCTTCCAGAGAT…
SJ-12~14	S18(Lim)	I	SRK kinase domain (1,108bp)	ATCGCAAGGCTTCAGCATATAACCTTGTTCAAGTTCTTGGCTGTTGCATTGACGGAGATGAGAAAATGCTGATATATGAGTATTTGGAAAATTTAAGCCTCGATTCTTTTCTCTTTGGTTAGAGCCTCATTCTTTTAAAAGCTCTATACAACAGTTGACTGTCGACAAAAATAAGCTAATCTGATCTGTCTGTGATCGATTTGTAGGAAAAACCCGGAGCTCTAAGCTAAGTTGGAAGGAGAGATTCGACATTACAAATGGTGTTGCTCGAGGGCTTTTATATCTTCATCAAGACTCACGGTTTAGGATAATCCACAGAGATTTGAAAGTAAGTAACATTTTGCTTGATAAAAATATGATCCCAAAGATCTCGGATTTTGGGATGGCCAGGATATTTGA…
			SLG (1,235bp)	CCTTTTCGCTTGTCTTTTTCGTCTTCATTCTATTTCGTCCTGCCTTTTCGATCAACACTTTGTCGTCTACAGAGTCTCTTACAATCTCAAGCAACAGAACACTTGTATCTCCCGGTGATGTCTTCGAGCTTGGTTTCTTCACTCCCGGATCAAGTTCTCGTTGGTATCTCGGGATATGGTACAAGAAATTGTCCGACAGAACCTATGTATGGGTTGCCAACAGAGATAACCCTCTCCCCAATTCCATTGGAACCCTCAAAATCTCCAACATGAACTTTGTCCTTCTTGGTGACTCCAATAAATCTGTTTGGTCGACGAATCTTATTAGAGGTAACGAGAGATCTCCGGTGGTGGCAGAGCTTCTCGCCAACGGAAACTTCGTGATGCGAGACACCAATA…
SJ-15~17	S4(Lim)	II	SLG (1,002bp)	CATTTACCACCATTCTTACACCTTCTCGTTCTTGCTAGTCTTCCTTGTCTTGATTCAATTTCATCCTGCCCTTTCGACCTATGTCAACACTATGTCGTCTTCAGAGTCTCTCACAATCTCAAGCAAGAGAACACTTGTATCTCCCGGTGGAGTCTTCGAGCTTGGTTTCTTCAGACCCTCGGGACGCTCGCGTTGGTATCTAGGAATATGGTATAAGAAAAACTCCTGGAAATTTTACCCATGGGTCGCATGGGTCGCCAACAGAGACAGCCCTCTCTCCAATTCCATTGGAACCCTCAAAATCTCTGGCAACAATCTTGTCCTGCTATGTCAGTCTAATAACACTGTTTGGTCGACAAATATTACTAGAGGTAATGCGAGATCTTCAGTTATAGCAGA…
SJ-18~20	S5(Lim)	II	SRK S domain (1,004bp)	ATTTACCACCATTCTTACACCTTATCGTTCTTGCTAGTCTTCCTTGTCTTGGTTCTATTTCATCCTGCCCATTCGATCTATGCCAACACTATGTCGTCTTCAGAGTCTCTCACAATCTCAAGCAACAGAACACTTGTATCTCCCGGTGGAATCTTCGAGCTTGGTTTCTTCAAACCCTCGGGACTCTCACGTTGGTACCTAGGAATATGGTATAAGAAAGTCTCCGAGAAAACCTACGCATGGGTCGCCAACAGAGACAACCCTCTCTCCAATTCCATTGGAACCCTCAAAATCTCTGGCAACAATCTTGTCTTGCTAGGTCAGTCTAATAACACTGTTTGGTCGACAAATCTTACTACATGTAATGTGAGATCTCCAGTGATAGCAGAGCTTCTTCAC…
			SRK kinase domain (1,053bp)	AGTTTGAGGGCGAGAAAGATCTTAATTTACGAGTACTTGGAGAATCTAAGCCTCGATTCTCATCTCTTTGGTTAGTTCCTCAACACCTCAGACAGATTTATTTTTACAGTTAAATGTCTTTGTAAATATGTTAATGTGATCATTTTGTGAACGGAGTGCAGATGAAACCAGAAGCTGTATGTTAAATTGGCAAATGAGATTTGATATTATCAACGGTATTGCCCGAGGTCTTCTGTATCTTCACCAAGATTCACGCTTTAGAATCATCCATAGGGATTTGAAAGCAAGCAATGTCTTACTTGATAAAAATATGACTCCAAAGATCTCGGATTTCGGGATGGCAAGGATATTTGGAGGGGATGAGACGGAAGCTAACACGAGGAAGGTGGTCGGAACTTA…
SJ-21	S21(Lim)	II	SRK kinase domain (1,015bp)	TTTACGAGTACTTGGAGAATCTAAGCCTCGATTCTCATCTCTTTGGTTAGTTCCTCAACACATCAGACAGATTTATTTTTACAGTTAAATGTCTTTGTAAATATGTTAATGTGATTATTTTGTGAACGGAGTGCAGATGAAACCAGAAGCTGTATGTTAAATTGGCAAATGAGATTTGATATTATCAACGGTATTGCCCGAGGGCTTCTGTATCTTCACCAAGATTCACGCTTTAGAATCATCCATAGGGATTTGAAAGCAAGCAATGTCTTACTTGATAAAAATATGACTCCAAAGATCTCGGATTTCGGGATGGCAAGGATCTTTGGAGGGGATGAGACGGAAGCTAACACGAGGAAGGTGGTCGGAACTTAGTAAGCAATTAAATCATCATCATCA…
			SLG (1,055bp)	CTCAAGCAACAGAACACTTGTATCTTCGGGTGGAGTCTTCGAGCTTGGTTTCTTCAAACCCTCGGGACTCTCACGTTGGTACCTAGGAATATGGTATAAGAAAGTCTCCGAGAAAACCTACGCATGGGTCGCCAACAGAGACAATCCTCTCTCCAATCCCATTGGAACCCTCAAAATCTCTGGCAACAATCTTGTCCTGATTGGTCAGTCTAACAACTCTGTTTGGTCGACAAATCTTACTACATGTAATGTGAGATCTCCAGTGATAGCAGAGCTTCTTCCCAACGGTAATTTTGTAATGAGATACTCCAACAACAAAGACTCAAGTGGATTCTTGTGGCAGAGTTTCGACTTTCCGACAGATACTTTACTTCCGGAGATGAAACTAGGTTACGATCG…
SJ-22	S26(Lim)	II	SLG(802bp)	TATGTCGTCTTCAGAGTCTCTCACAATCTCAAGCAAGAGAACACTTGTATCTCCCGGTGGAGTCTTCGAGCTTGGTTTCTTCAGACCCTCGGGACGCTCGCGTTGGTATCTCGGAATATGGTATAAGAAAGTCTCCCAGAAAACCTACGCATGGGTCGCCAACAGAGACAGCCCTCTCTCCAATTCCATTGGAATCCTCAAAATCTCTGGCAACAACCTTGTCCTGCTATGTCAGTCTAATAACACTGTTTGGTCGACAAATATTACTAGAGGTAATGCGAGATCTCCAGTGATAGCAGAGCTTCTTCCCAACGGTAATTTTGTAATGAGATACTCCAACAACAGAGACCCAAGTGGATTCTTGTGGCAGAGTTTCGATTTTCCGACAGATACTTTACT…
